# Supplementary material
Source: ML conference proceedings conference paper supplement (https://openreview.net/forum?id=M3zxsDL2Rk)
Supplement: supplementary_material [file Cycle_Sync_supp.pdf › Cycle_Sync_supp.pdf]

## Supplementary Material

We provide additional theoretical and experimental details that complement the main paper. In Section A, we present full proofs of Theorem 2.1. Section B explains the sample complexity analysis that underlies the bounds for T-AAB reported in Table 1. Sections C, D provide additional experimental results: 3D reconstructions (Section C and D), supplementary figures to the ETH3D dataset (Section E), runtime comparisons (Section F), and extended results on rotation synchronization (Section G), and generalization to the IMC-PT dataset (Section H).

All equation, figure, table, and theorem numbers continue from the main paper.

### A Proofs of theory

We first establish Theorem A.1 and then conclude the main theorem.

**Theorem A.1.** Assume there exists an absolute  $\alpha > 0$  such that for any  $ij \in E_g$  and  $k \in N_{ij}$ ,  $\alpha < \theta_{ij,k} < \pi - \alpha$ . Then for  $ij \in E_g$ , we have  $\tilde{d}_{ij,k} \leq C_\alpha(\tilde{s}_{ik}^* + \tilde{s}_{jk}^*)$ , where  $C_\alpha = \frac{2(\cos \alpha + \sqrt{5-4\cos^2 \alpha})}{\sin^2 \alpha}$ .

We note that the triangle is ill-shaped whenever  $\theta_{ij,k} \approx 0$  or  $\theta_{ij,k} \approx \pi$ . In practice, we want  $d_{ij,k}$  to be small for a clean edge  $ij \in E_g$  whenever the other two edges are relatively clean with small  $\tilde{s}_{ik}^*$  and  $\tilde{s}_{jk}^*$ . However, in these two ill-shaped cases,  $C_\alpha$  in the theorem goes to infinity, and there is no effective upper bound to control  $\tilde{d}_{ij,k}$ .

**Proof.** Let  $\gamma_p$  be the projected vector of  $\gamma_{ij}$  onto  $\text{Span}(\gamma_{ik}, \gamma_{jk})$ . Denote  $x = \gamma_{ij}^T \gamma_{ki}$ ,  $y = \gamma_{ij}^T \gamma_{jk}$  and  $z = \gamma_{jk}^T \gamma_{ki}$ . Since  $\gamma_p$  is in  $\text{Span}(\gamma_{ki}, \gamma_{jk})$ , there exists constants  $a, b$  such that  $\gamma_p = a\gamma_{ki} + b\gamma_{jk}$ . By the definition of  $\gamma_p$ , we have

$$\begin{cases} \langle \gamma_{ij} - a\gamma_{ki} - b\gamma_{jk}, \gamma_{ki} \rangle = 0 \\ \langle \gamma_{ij} - a\gamma_{ki} - b\gamma_{jk}, \gamma_{jk} \rangle = 0 \end{cases} \quad (11)$$

By linearity of vector inner products, we have

$$\begin{cases} x - a - bz = 0 \\ y - az - b = 0 \end{cases} \quad (12)$$

Solving for  $a$  and  $b$  gives

$$\begin{cases} a = \frac{x-yz}{1-z^2} \\ b = \frac{y-xz}{1-z^2} \end{cases} \quad (13)$$

Therefore  $\gamma_p = \frac{x-yz}{1-z^2} \gamma_{ki} + \frac{y-xz}{1-z^2} \gamma_{jk}$ .

**Case 1:**  $\gamma_p \notin \Omega(\gamma_{jk}, \gamma_{ki})$ . In this case, since  $\tilde{d}_{ij,k} \leq 1$ , we only need to prove  $\tilde{s}_{ik}^* + \tilde{s}_{jk}^* > 1/C_\alpha$ .

Note that by the definition of  $\Omega(\gamma_{jk}, \gamma_{ki})$  we have either  $a < 0$  or  $b < 0$ , which implies  $x - yz > 0$  or  $y - xz > 0$ . On the other hand, since the ground truth directions  $\gamma_{ij}^*$ ,  $\gamma_{jk}^*$ ,  $\gamma_{ki}^*$  are cycle consistent, we know that the projection of  $\gamma_{ij}^*$  onto  $\text{Span}(\gamma_{ki}^*, \gamma_{jk}^*)$  is in the set  $\Omega(\gamma_{ki}^*, \gamma_{jk}^*)$ . Therefore we also have  $x^* - y^*z^* < 0$  and  $y^* - x^*z^* < 0$ , where  $x^* = \gamma_{ij}^{*T} \gamma_{ki}^*$ ,  $y^* = \gamma_{ij}^{*T} \gamma_{jk}^*$  and  $z^* = \gamma_{jk}^{*T} \gamma_{ki}^*$ . Without loss of generality, we assume the case  $x - yz > 0$ . If  $\max(\tilde{s}_{ik}^*, \tilde{s}_{jk}^*) \geq \frac{1}{C_\alpha}$ , then the lemma is trivial. If  $\max(\tilde{s}_{ik}^*, \tilde{s}_{jk}^*) < \frac{1}{C_\alpha}$ , we first verify two claims.

**Claim 1:**  $x^* - y^*z^* < -\sin \alpha^*$ , where  $\alpha^*$  is the angle such that  $\cos \alpha^* = \cos \alpha + \frac{2}{C_\alpha}$ .

By the definition of  $\tilde{s}_{ik}^*$  and  $\tilde{s}_{jk}^*$ , we have the following inequality:

$$|\gamma_{ik} - \gamma_{ik}^*| + |\gamma_{jk} - \gamma_{jk}^*| = 2 \sin \frac{\tilde{s}_{ik}^*}{2} + 2 \sin \frac{\tilde{s}_{jk}^*}{2} \leq \tilde{s}_{ik}^* + \tilde{s}_{jk}^* \leq \frac{2}{C_\alpha}. \quad (14)$$

Also,  $\alpha < \theta_{ij,k} < \pi - \alpha$  is equivalent to  $|\gamma_{jk}^T \gamma_{ki}| = |\cos \theta_{ij,k}| < \cos \alpha$ . Combining this with equation (14) gives

$$\begin{aligned}
|\gamma_{jk}^{*T} \gamma_{ki}^*| &= |\gamma_{jk}^T \gamma_{ki} + (\gamma_{jk}^* - \gamma_{jk})^T \gamma_{ki} + \gamma_{jk}^{*T} (\gamma_{ki}^* - \gamma_{ki})| \\
&\leq |\gamma_{jk}^T \gamma_{ki}| + |(\gamma_{jk}^* - \gamma_{jk})^T \gamma_{ki}| + |\gamma_{jk}^{*T} (\gamma_{ki}^* - \gamma_{ki})| \\
&\leq |\gamma_{jk}^T \gamma_{ki}| + |\gamma_{jk}^* - \gamma_{jk}| + |\gamma_{ki}^* - \gamma_{ki}| \\
&\leq \cos \alpha + \frac{2}{C_\alpha} = \cos \alpha^*.
\end{aligned} \tag{15}$$

On the other hand, we know that  $a^* = \frac{x^* - y^* z^*}{1 - z^{*2}}$ , and  $a^* = -|a^*| \leq -\sin \alpha^*$ . This implies that  $x^* - y^* z^* < -\frac{\sin \alpha^*}{1} = -\sin \alpha^*$ .

**Claim 2:** Let  $\delta_{ij} = \gamma_{ij} - \gamma_{ij}^*$ ,  $\delta_{jk} = \gamma_{jk} - \gamma_{jk}^*$  and  $\delta_{ki} = \gamma_{ki} - \gamma_{ki}^*$ . Suppose  $\max(|\delta_{ij}|, |\delta_{jk}|, |\delta_{ki}|) = \delta$ . Then  $|(x^* - y^* z^*) - (x - yz)| \leq 6\delta$ ; if  $ij \in E_g$  (i.e.  $\delta_{ij} = 0$ ), then  $|(x^* - y^* z^*) - (x - yz)| \leq 4\delta$ .

In fact, by the definition of  $x, x^*, y, y^*, z, z^*$ , we have the following estimate:

$$\begin{aligned}
|(x^* - y^* z^*) - (x - yz)| &= |(\gamma_{ij}^{*T} \gamma_{ki}^* - \gamma_{ij}^{*T} \gamma_{jk}^* \gamma_{jk}^{*T} \gamma_{ki}^*) - ((\gamma_{ij}^* + \delta_{ij})^T (\gamma_{ki}^* + \delta_{ki}) \\
&\quad - (\gamma_{ij}^* + \delta_{ij})^T (\gamma_{jk}^* + \delta_{jk}) (\gamma_{jk}^* + \delta_{jk})^T (\gamma_{ki}^* + \delta_{ki}))| \\
&\leq |-\delta_{ij}^T \gamma_{ki} - \gamma_{ij}^{*T} \delta_{ki} - (\delta_{ij}^T \gamma_{jk} \gamma_{jk}^T \gamma_{ki} + \gamma_{ij}^{*T} \delta_{jk} \gamma_{jk}^T \gamma_{ki} \\
&\quad + \gamma_{ij}^{*T} \gamma_{jk} \delta_{jk}^T \gamma_{ki} + \gamma_{ij}^{*T} \gamma_{jk} \gamma_{jk}^T \delta_{ki})| \\
&\leq |\delta_{ij}^T \gamma_{ki}| + |\gamma_{ij}^{*T} \delta_{ki}| + |\delta_{ij}^T \gamma_{jk} \gamma_{jk}^T \gamma_{ki}| + |\gamma_{ij}^{*T} \delta_{jk} \gamma_{jk}^T \gamma_{ki}| \\
&\quad + |\gamma_{ij}^{*T} \gamma_{jk} \delta_{jk}^T \gamma_{ki}| + |\gamma_{ij}^{*T} \gamma_{jk} \gamma_{jk}^T \delta_{ki}|.
\end{aligned} \tag{16}$$

By the fact that all  $\gamma$ 's are unit vectors, the right hand side of the equation above is at most  $6\delta$  in general; if  $ij \in E_g$  (i.e.  $\delta_{ij} = 0$ ) then it is at most  $4\delta$ .

Combining claim 1 and claim 2, we know that  $0 < x - yz \leq (x^* - y^* z^*) + |(x - yz) - (x^* - y^* z^*)| \leq 4\delta - \sin \alpha^*$ . This yields  $\delta > \frac{\sin \alpha^*}{4}$ . Note that by  $ij \in E_g$ , we know that  $\delta_{ij} = 0$ . Therefore  $\delta = \max(|\delta_{ij}|, |\delta_{jk}|, |\delta_{ki}|) = \max(|\delta_{jk}|, |\delta_{ki}|) \leq |\delta_{jk}| + |\delta_{ki}| = 2 \sin \frac{\tilde{s}_{jk}^*}{2} + 2 \sin \frac{s_{ki}^*}{2} \leq \tilde{s}_{jk}^* + s_{ki}^*$ . By  $C_\alpha = \frac{2(\cos \alpha + \sqrt{5-4\cos^2 \alpha})}{\sin^2 \alpha}$ , we know that  $\frac{\sin \alpha^*}{4} = \frac{1}{C_\alpha}$ , therefore the theorem is proved.

**Case 2:**  $\gamma_p \in \Omega(\gamma_{ik}, \gamma_{kj})$ . In this case, let  $\delta_{ik} = \gamma_{ik} - \gamma_{ik}^*$  and  $\delta_{jk} = \gamma_{jk} - \gamma_{jk}^*$ . Then  $\tilde{d}_{ij,k} = \frac{|\gamma_{ik} \times \gamma_{kj} \cdot \gamma_{ij}|}{\sin \theta_{ijk}}$ . By the fact that  $\gamma_{ij}^*, \gamma_{jk}^*, \gamma_{ki}^*$  are coplanar and  $\gamma_{ij} = \gamma_{ij}^*$ , we know that  $\gamma_{ik}^* \times \gamma_{kj}^* \cdot \gamma_{ij} = 0$ . We have the following inequalities:

$$\begin{aligned}
\tilde{d}_{ij,k} &= \frac{|\gamma_{ik} \times \gamma_{kj} \cdot \gamma_{ij}|}{\sin \theta_{ij,k}} \\
&= \frac{|(\gamma_{ik}^* + \delta_{ik}) \times (\gamma_{kj}^* + \delta_{kj}) \cdot \gamma_{ij}|}{\sin \theta_{ij,k}} \\
&= \frac{|(\delta_{ik} \times (\gamma_{kj}^* + \delta_{kj}) + \gamma_{ik}^* \times \delta_{kj}) \cdot \gamma_{ij}|}{\sin \theta_{ij,k}} \\
&\leq \frac{|\delta_{ik}| |\gamma_{kj}^* + \delta_{kj}| + |\gamma_{ik}^*| |\delta_{kj}|}{\sin \theta_{ij,k}} \\
&\leq \frac{\delta_{ik} + \delta_{kj}}{\sin \alpha}.
\end{aligned} \tag{17}$$

$$\leq \frac{\delta_{ik} + \delta_{kj}}{\sin \alpha}. \tag{18}$$

Note that  $|\delta_{ik}| = 2 \sin \frac{\tilde{s}_{ik}^*}{2} \leq \tilde{s}_{ik}^*$ , and similarly  $|\delta_{jk}| = 2 \sin \frac{\tilde{s}_{jk}^*}{2} \leq \tilde{s}_{jk}^*$ . Therefore  $\tilde{d}_{ij,k} \leq \frac{1}{\sin \alpha} (\tilde{s}_{ik}^* + \tilde{s}_{jk}^*) \leq C_\alpha (\tilde{s}_{ik}^* + \tilde{s}_{jk}^*)$ , where the latter inequality comes from the fact that  $C_\alpha \geq \frac{1}{\sin \alpha}$ .

## Proof of the main theorem.

Recall the statement of Theorem [2.1](#):

**Main Theorem** (Theorem [2.1](#)). Assume there exists  $\alpha > 0$  such that for all  $ij \in E_g$  and  $k \in N_{ij}$ ,  $\alpha < \theta_{ij,k} < \pi - \alpha$ , and  $\lambda < 1 + eC_\alpha/\mu - \sqrt{eC_\alpha(2\mu + eC_\alpha)}/\mu$ , where  $C_\alpha = 2(\cos \alpha + \sqrt{5 - 4\cos^2 \alpha})/\sin^2 \alpha$ . Then, for  $\tilde{s}_{ij,t}$  computed by the iteratively reweighted AAB algorithm [\[25\]](#) using  $\beta_0 \leq \frac{1}{2\lambda}$  and  $\beta_{t+1} = r\beta_t$  with  $1 < r < \mu(1 - \lambda)^2/(2eC_\alpha\lambda)$ , it holds for all  $t > 0$  that

$$\forall ij \in E_g, \quad \tilde{s}_{ij,t} \leq \frac{1}{2\beta_0 r^t}, \quad \forall ij \in E_b, \quad \tilde{s}_{ij,t} \geq \frac{\mu}{e}(1 - \lambda)\tilde{s}_{ij}^*.$$

**Proof.** We prove the main theorem by induction. For  $t = 0$ , the definition of  $\lambda$  imply that for all  $ij \in E$ ,

$$\tilde{s}_{ij}^{(0)} = \frac{\sum_{k \in N_{ij}} \tilde{d}_{ij,k}}{|N_{ij}|} \geq \frac{\sum_{k \in G_{ij}} \tilde{d}_{ij,k}}{|N_{ij}|} \geq \mu \frac{|G_{ij}|}{|N_{ij}|} \tilde{s}_{ij}^* \geq \mu(1 - \lambda)\tilde{s}_{ij}^*.$$

Furthermore, by the fact that  $0 \leq \tilde{d}_{ij,k} \leq 1$  we have for all  $ij \in E_g$ ,

$$\tilde{s}_{ij}^{(0)} = \frac{\sum_{k \in N_{ij}} \tilde{d}_{ij,k}}{|N_{ij}|} = \frac{\sum_{k \in B_{ij}} \tilde{d}_{ij,k}}{|N_{ij}|} \leq \frac{\sum_{k \in B_{ij}} 1}{|N_{ij}|} \leq \lambda \leq \frac{1}{2\beta_0}.$$

Therefore the theorem is proved when  $t = 0$ .

Next, we assume the theorem holds true for  $0, 1, \dots, t$ , and show that it also holds true for  $t + 1$ . By the definition of  $\tilde{s}_{ij}^{(t+1)}$  and the induction assumption  $\frac{1}{2\beta_t} \geq \max_{ij \in E_g} \tilde{s}_{ij,t}$ , we have the following inequalities for any  $ij \in E_b$ :

$$\begin{aligned} \tilde{s}_{ij}^{(t+1)} &= \frac{\sum_{k \in N_{ij}} e^{-\beta_t(\tilde{s}_{ik}^{(t)} + \tilde{s}_{jk}^{(t)})} \tilde{d}_{ij,k}}{\sum_{k \in N_{ij}} e^{-\beta_t(\tilde{s}_{ik}^{(t)} + \tilde{s}_{jk}^{(t)})}} \\ &\geq \frac{\sum_{k \in G_{ij}} e^{-\beta_t(\tilde{s}_{ik}^{(t)} + \tilde{s}_{jk}^{(t)})} \tilde{d}_{ij,k}}{\sum_{k \in N_{ij}} e^{-\beta_t(\tilde{s}_{ik}^{(t)} + \tilde{s}_{jk}^{(t)})}} \\ &\geq \frac{\sum_{k \in G_{ij}} e^{-1} \tilde{d}_{ij,k}}{|N_{ij}|} \\ &\geq \frac{\mu}{e} \frac{|G_{ij}|}{|N_{ij}|} \tilde{s}_{ij}^* \\ &\geq \frac{\mu(1 - \lambda)}{e} \tilde{s}_{ij}^*. \end{aligned} \tag{19}$$

Next we bound  $\tilde{s}_{ij}^{(t+1)}$  for  $ij \in E_g$ . By the definition of  $\tilde{s}_{ij}^{(t+1)}$ , the fact that  $\tilde{d}_{ij,k} = 0$  for  $k \in G_{ij}$ , and Theorem [A.1](#) we know that

$$\tilde{s}_{ij}^{(t+1)} = \frac{\sum_{k \in N_{ij}} e^{-\beta_t(\tilde{s}_{ik}^{(t)} + \tilde{s}_{jk}^{(t)})} \tilde{d}_{ij,k}}{\sum_{k \in N_{ij}} e^{-\beta_t(\tilde{s}_{ik}^{(t)} + \tilde{s}_{jk}^{(t)})}} = \frac{\sum_{k \in B_{ij}} e^{-\beta_t(\tilde{s}_{ik}^{(t)} + \tilde{s}_{jk}^{(t)})} \tilde{d}_{ij,k}}{\sum_{k \in N_{ij}} e^{-\beta_t(\tilde{s}_{ik}^{(t)} + \tilde{s}_{jk}^{(t)})}} \tag{20}$$

$$\leq \frac{C_\alpha \sum_{k \in B_{ij}} e^{-\beta_t(\tilde{s}_{ik}^{(t)} + \tilde{s}_{jk}^{(t)})} (\tilde{s}_{ik}^* + \tilde{s}_{jk}^*)}{\sum_{k \in N_{ij}} e^{-\beta_t(\tilde{s}_{ik}^{(t)} + \tilde{s}_{jk}^{(t)})}}. \tag{21}$$

By the induction assumption that  $\tilde{s}_{ij}^{(t)} \geq \frac{\mu(1 - \lambda)}{e} \tilde{s}_{ij}^*$  for all  $ij \in E$ , we know that

$$\sum_{k \in B_{ij}} e^{-\beta_t(\tilde{s}_{ik}^{(t)} + \tilde{s}_{jk}^{(t)})} (\tilde{s}_{ik}^* + \tilde{s}_{jk}^*) \leq \sum_{k \in B_{ij}} e^{-\beta_t \frac{\mu(1 - \lambda)}{e} (\tilde{s}_{ik}^* + \tilde{s}_{jk}^*)} (\tilde{s}_{ik}^* + \tilde{s}_{jk}^*). \tag{22}$$

Note that  $xe^{-cx} < \frac{1}{ce}$  for any  $c > 0$  and  $x > 0$ . Let  $c = \beta_t \frac{\mu(1-\lambda)}{e}$  and  $x = \tilde{s}_{ik}^* + \tilde{s}_{jk}^*$ , we have

$$\sum_{k \in B_{ij}} e^{-\beta_t \frac{\mu(1-\lambda)}{e} (\tilde{s}_{ik}^* + \tilde{s}_{jk}^*)} (\tilde{s}_{ik}^* + \tilde{s}_{jk}^*) \leq \sum_{k \in B_{ij}} \frac{1}{\beta_t \mu(1-\lambda)} = \frac{|B_{ij}|}{\beta_t \mu(1-\lambda)}. \quad (23)$$

Also, by the induction assumption that  $\frac{1}{2\beta_t} \geq \max_{ij \in E_g} \tilde{s}_{ij}^{(t)}$  and the nonnegativity of  $\tilde{s}_{ij}^{(t)}$ 's, we have

$$\sum_{k \in N_{ij}} e^{-\beta_t (\tilde{s}_{ik}^{(t)} + \tilde{s}_{jk}^{(t)})} \geq \sum_{k \in G_{ij}} e^{-\beta_t (\tilde{s}_{ik}^{(t)} + \tilde{s}_{jk}^{(t)})} \geq |G_{ij}| e^{-1}. \quad (24)$$

Combining (20), (22), (23), (24) and the definition of  $\lambda$ , we have

$$\tilde{s}_{ij}^{(t+1)} \leq \frac{|B_{ij}|}{|G_{ij}|} \cdot \frac{eC_\alpha}{\beta_t \mu(1-\lambda)} \leq \frac{2eC_\alpha \lambda}{\mu(1-\lambda)^2} \cdot \frac{1}{2\beta_t}. \quad (25)$$

By the assumption that  $\lambda < 1 + \frac{eC_\alpha}{\mu} - \sqrt{\frac{eC_\alpha}{\mu}(2 + \frac{eC_\alpha}{\mu})}$ , we know that  $\frac{2e\lambda}{\mu(1-\lambda)^2} < 1$ . Therefore by taking  $1 < r < \frac{\mu(1-\lambda)^2}{2e\lambda}$ , we guarantee that for any  $ij \in E_g$ ,  $\tilde{s}_{ij}^{(t+1)} \leq \frac{1}{2\beta_{t+1}} = \frac{1}{2\beta_0 r^{t+1}}$ . This and (19) concludes our theorem.  $\square$

**Comment on the order of  $\mu$ :** We remark that in the theorem  $\mu = \min_{ij \in E_b} \sum_{k \in G_{ij}} \tilde{d}_{ij,k} / (|G_{ij}| \tilde{s}_{ij}^*)$ , which implies that for all  $ij \in E$ ,

$$\frac{1}{|G_{ij}|} \sum_{k \in G_{ij}} \tilde{d}_{ij,k} \geq \mu \tilde{s}_{ij}^*. \quad (26)$$

We would like to investigate the dependence of  $\mu$  on  $n$ . That is, we estimate the magnitude of  $\mu$  such that (26) holds for all edges. First of all, it is safe to claim that (26) holds for all  $ij$  whose  $\tilde{s}_{ij}^* > 0.5$  when  $\mu$  is a positive constant (i.e.,  $\mu = \Theta(1)$ ). That is, the left-hand side of (26) is lower bounded by a positive constant. Let  $\mathbf{n}_{ij,k}$  be the normal vector of the plane  $\text{Span}\{\mathbf{t}_k^* - \mathbf{t}_i^*, \mathbf{t}_k^* - \mathbf{t}_j^*\}$ , where  $\mathbf{t}_i^*$  follows the standard Gaussian distribution. For  $\tilde{s}_{ij}^* \leq 0.5$ , one can show that

$$\begin{aligned} \frac{1}{|G_{ij}|} \sum_{k \in G_{ij}} \tilde{d}_{ij,k} &\geq \frac{1}{|G_{ij}|} \sum_{k \in G_{ij}} |\gamma_{ij}^\top \mathbf{n}_{ij,k}| \geq \frac{c'}{\sqrt{\log n}} |\gamma_{ij}^\top \gamma_{ij}^*| \\ &= \frac{c}{\sqrt{\log n}} \min(\tilde{s}_{ij}^*, 1 - \tilde{s}_{ij}^*) = \frac{c}{\sqrt{\log n}} \tilde{s}_{ij}^*, \end{aligned} \quad (27)$$

for some absolute constant  $c', c$ , which suggests

$$\mu \geq c/\sqrt{\log n}.$$

In (27), the first inequality follows from the definition of  $\tilde{d}_{ij,k}$ , the first equality follows from the definition of  $\tilde{s}_{ij}^*$  and the last equality is due to the assumption  $\tilde{s}_{ij}^* \leq 0.5$ . The second inequality is commonly assumed for all  $ij \in E$  in [7, 12, 25], which they call the  $c/\sqrt{\log n}$ -well-distributed condition. It is proved in [7] that if  $\mathbf{t}_i^*$  is i.i.d. with standard Gaussian, then  $c/\sqrt{\log n}$ -well-distributed condition holds with high probability.

## B Explanation of the Order of Complexity for T-AAB in Table 1

We assume the Erdős–Rényi graph  $G(n, p)$ , where  $p$  is the probability of connecting two nodes, with edge corruption probability  $q$ . We show that the recovery guarantee in Theorem 2.1 holds under this probabilistic model, provided

$$p = \Omega(n^{-1/2} \log^{1/2} n) \quad (28)$$

and

$$\epsilon_b = pq = O(p/\sqrt{\log n}). \quad (29)$$

We note that given (28), (29) is equivalent to

$$q = O(1/\sqrt{\log n}). \quad (30)$$

We first verify (30), where we note that it is sufficient to focus on the worst case

$$q = c_1 / \sqrt{\log n} \text{ for an absolute constant } c_1.$$

That is, we show that this choice is sufficient for exact recovery with high probability.

We prove exact recovery by establishing with high probability the sufficient condition of Theorem 2.1

$$\lambda < 1 + \frac{eC_\alpha}{\mu} - \sqrt{\frac{eC_\alpha}{\mu} \left(2 + \frac{eC_\alpha}{\mu}\right)}. \quad (31)$$

We control the ratio of bad cycles as follows. For any fixed edge  $ij \in E$ ,  $\lambda_{ij} = |B_{ij}|/|N_{ij}|$  is the average of the Bernoulli random variables  $X_k = \mathbf{1}_{\{k \in B_{ij}\}}$  where  $k \in B_{ij}$  with probability  $1 - (1 - q)^2$ . Consequently,

$$\mathbb{E}(\lambda_{ij}) = 1 - (1 - q)^2 = q(2 - q) \leq 2q = \frac{2c_1}{\sqrt{\log n}}.$$

Next, we investigate the concentration bound for  $\lambda_{ij}$  and then for  $\lambda = \max_{ij} \lambda_{ij}$ . We recall the following one-sided Chernoff bound [4] for independent Bernoulli random variables  $\{X_l\}_{l=1}^n$  with means  $\{p_l\}_{l=1}^n$ ,  $\bar{p} = \sum_{l=1}^n p_l / n$ , and any  $\eta \geq 1$ :

$$\Pr \left( \frac{1}{n} \sum_{l=1}^n X_l > (1 + \eta) \bar{p} \right) < e^{-\frac{\eta^2}{2+\eta} \bar{p} n}. \quad (32)$$

Applying (32) with the random variables  $X_k = \mathbf{1}_{\{k \in B_{ij}\}}$  and  $\eta = 1$ ,

$$\Pr \left( \lambda_{ij} > \frac{4c_1}{\sqrt{\log n}} \right) < e^{-\frac{2c_1}{3} \frac{|N_{ij}|}{\log |N_{ij}|}}. \quad (33)$$

To control the size of  $|N_{ij}|$  in above probability bound, we use the following Chernoff bound [4] for i.i.d. Bernoulli random variables  $\{X_l\}_{l=1}^m$  with means  $\mu$  and any  $0 < \eta < 1$ :

$$\Pr \left( \left| \frac{1}{m} \sum_{l=1}^m X_l - \mu \right| > \eta \mu \right) < 2e^{-\frac{\eta^2}{3} \mu m}. \quad (34)$$

We note that by applying (34) with the random variables  $\mathbf{1}_{\{k \in N_{ij}\}}$  and  $\eta = 1/2$ , we obtain that

$$\Pr \left( N_{ij} < \frac{1}{2} np^2 \right) < 2e^{-\frac{1}{12} np^2}. \quad (35)$$

By combining the bounds in (33) and (35), we have for sufficiently large  $n$

$$\Pr \left( \lambda_{ij} > \frac{4c_1}{\sqrt{\log n}} \right) < e^{-\frac{2c_1}{3} \frac{\frac{1}{2} np^2}{\log \frac{1}{2} np^2}} + 2e^{-\frac{1}{12} np^2} < e^{-\frac{c_1}{4} np^2} + 2e^{-\frac{1}{12} np^2}. \quad (36)$$

By applying a union bound over  $ij \in E$ , we have

$$\Pr \left( \lambda > \frac{4c_1}{\sqrt{\log n}} \right) < |E| e^{-\frac{c_1}{4} np^2} + 2|E| e^{-\frac{1}{12} np^2}, \quad (37)$$

where  $\lambda = \max_{ij} \lambda_{ij}$ . Therefore, with  $q = c_1 / \sqrt{\log n}$  and sufficiently large  $n$ , we have

$$\lambda < \frac{4c_1}{\sqrt{\log n}} \quad \text{w.p.} \quad 1 - |E| e^{-\frac{c_1}{4} np^2} - 2|E| e^{-\frac{1}{12} np^2} \quad (38)$$

Finally, we show for a proper constant  $c_1$ , (31) holds with high probability, and the exact recovery is concluded. We note that the RHS of (31) is lower bounded by

$$\begin{aligned} 1 + \frac{eC_\alpha}{\mu} - \sqrt{\frac{eC_\alpha}{\mu} \left(2 + \frac{eC_\alpha}{\mu}\right)} &= \frac{1}{1 + \frac{eC_\alpha}{\mu} + \sqrt{\frac{eC_\alpha}{\mu} \left(2 + \frac{eC_\alpha}{\mu}\right)}} \\ &\geq \frac{1}{2\sqrt{\frac{eC_\alpha}{\mu} \left(2 + \frac{eC_\alpha}{\mu}\right)}} > \frac{1}{2\left(2 + \frac{eC_\alpha}{\mu}\right)} > \frac{1}{\frac{3eC_\alpha}{\mu}} = \frac{\mu}{3eC_\alpha}. \end{aligned} \quad (39)$$

Combining this estimate of  $\mu$  with (39), we obtain

$$1 + \frac{eC_\alpha}{\mu} - \sqrt{\frac{eC_\alpha}{\mu} \left(2 + \frac{eC_\alpha}{\mu}\right)} > \frac{c}{3eC_\alpha} \frac{1}{\sqrt{\log n}}. \quad (40)$$

Therefore, to guarantee (31) it suffices to let RHS of (38) be bounded from above by the RHS of (40). Namely, we require that

$$\frac{4c_1}{\sqrt{\log n}} < \frac{c}{3eC_\alpha} \frac{1}{\sqrt{\log n}},$$

which can be easily satisfied by setting  $c_1 < \frac{c}{12eC_\alpha}$ . Therefore, with the order of  $q = (c/(12eC_\alpha\sqrt{\log n}))$  and equivalently  $\epsilon_b = (cp/(12eC_\alpha\sqrt{\log n}))$ , we can guarantee (31) and hence exact recovery with the probability specified in (38). Consequently, we verify that (30) is sufficient for exact recovery with the latter probability.

We finally note that assuming (28), that is,  $p \geq c_0 n^{-1/2} \log^{1/2} n$  for sufficiently large constant  $c_0$ , the probability specified in (38) is high. Indeed,

$$1 - |E|e^{-\frac{c_1}{4}np^2} - 2|E|e^{-\frac{1}{12}np^2} > 1 - 3n^2 \exp(-\min\{\frac{c_1}{4}, \frac{1}{12}\}np^2) \quad (41)$$

$$> 1 - 3n^2 \exp(-\min\{\frac{c_1}{4}, \frac{1}{12}\}c_0 \log n) = 1 - 3n^{2-\min\{\frac{c_1}{4}, \frac{1}{12}\}c_0}. \quad (42)$$

Thus, with high probability, the recovery conditions in Theorem 2.1 are satisfied when (28) and (29) hold. We thus verify the bounds reported for T-AAB in Table I.

## C Visualization of 3D sparse models on ETH3D

We compare 3D sparse point cloud reconstructions of Cycle-Sync, GLOMAP and Theia. For GLOMAP and Theia, we use their default reconstruction parameters. For the Cycle-Sync pipeline, we feed the resulting camera poses to the 3D point triangulator in COLMAP (it uses bundle adjustment for the triangulations, while fixing camera pose estimators) and return the sparse 3D model. The latter was done quickly without careful tuning of parameters. Table 2 compares the number of triangulated 3D points for different SfM pipelines and some 3D sparse models on ETH3D. Tables 3 and 4 demonstrate the actual 3D sparse models by these methods.

We observe from Table 2 that for 9 out of the 13 datasets, Cycle-Sync improves the number of triangulated 3D points. This leads to an improvement of the overall quality of reconstruction for these datasets as noticed in Tables 3 and 4. This is due to the improvement on initial camera poses thanks to Cycle-Sync. For the other 4 datasets, Cycle-Sync fails to recover a meaningful 3D sparse model. For two of these datasets (meadow and office) all three methods are not performing well. For one dataset (relief) Theia is the only one which performs well and for the last dataset (relief\_2) GLOMAP performs better than the other two methods.

| Dataset       | Cycle-Sync   | GLOMAP       | Theia        |
|---------------|--------------|--------------|--------------|
| courtyard     | <b>30851</b> | 27674        | 17835        |
| delivery_area | <b>49306</b> | 25403        | 9534         |
| electro       | <b>28061</b> | 24477        | 2641         |
| facade        | <b>86111</b> | 66302        | 70571        |
| kicker        | <b>26649</b> | 18685        | 10232        |
| meadow        | 647          | <b>667</b>   | 649          |
| office        | 1351         | <b>2686</b>  | 1395         |
| pipes         | <b>8662</b>  | 3551         | 1423         |
| playground    | <b>16885</b> | 11816        | 416          |
| relief        | 1642         | 12617        | <b>29588</b> |
| relief_2      | 1695         | <b>16902</b> | 3212         |
| terrace       | <b>25285</b> | 13898        | 7216         |
| terrains      | <b>47485</b> | 25082        | 12876        |

Table 2: Number of triangulated 3D points for each dataset using Cycle-Sync, GLOMAP, and Theia

| Dataset       | Cycle-Sync                                                                          | GLOMAP                                                                               | Theia                                                                                 |
|---------------|-------------------------------------------------------------------------------------|--------------------------------------------------------------------------------------|---------------------------------------------------------------------------------------|
| courtyard     | 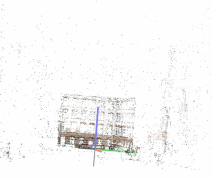   |    |    |
| delivery_area |    |    |    |
| electro       |    |    |    |
| facade        |    |    |    |
| kicker        |    |    |    |
| meadow        |   |   |   |
| office        |  |  |  |
| pipes         |  |  |  |
| playground    |  |  |  |

Table 3: Triangulated 3D reconstructions (Part 1) using Cycle-Sync, GLOMAP, and Theia.

## D Visualization of Camera Pose Estimation

We demonstrate pose estimation results for four scenes: *courtyard*, *meadow*, *office*, and *pipes*. For each scene, we compare the ground-truth camera poses with those estimated by GLOMAP, Theia, and Cycle-Sync. Figures 5-8 illustrate these comparisons. For the first three scenes, Cycle-Sync produces camera poses that align more closely with the ground truth, while GLOMAP and Theia exhibit larger misalignments. In the *pipes* scene, both Cycle-Sync and GLOMAP achieve good alignment, whereas Theia fails to produce meaningful results.

| Dataset  | Cycle-Sync                                                                        | GLOMAP                                                                            | Theia                                                                               |
|----------|-----------------------------------------------------------------------------------|-----------------------------------------------------------------------------------|-------------------------------------------------------------------------------------|
| relief   | 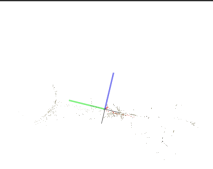 |  |  |
| relief_2 |  |  |  |
| terrace  |  |  |  |
| terrains |  |  |  |

Table 4: Triangulated 3D reconstructions (Part 2) using Cycle-Sync, GLOMAP, and Theia.

## E Supplementary Tables for ETH3D

We provide additional tables and figures to demonstrate the pose estimation quality of Cycle-Sync. Table 5 demonstrates the location error for each SfM pipeline. Table 6 demonstrates the location error for different location estimation algorithms. Table 7 demonstrates the effect of each building block of Cycle-Sync by beginning with the LUD pipeline, and gradually adding MPLS, MPLS-cycle, Cycle-Sync and STE.

Table 5: Translation Error of each SfM pipeline on ETH3D. Here  $\bar{t}$  and  $\hat{t}$  denote the mean translation error and median translation error, respectively. BA refers to bundle adjustment.

| Scene          | Cycle-Sync  |             | LUD       |           | GLOMAP (with BA) |           | Theia (with BA) |           |
|----------------|-------------|-------------|-----------|-----------|------------------|-----------|-----------------|-----------|
|                | $\bar{t}$   | $\hat{t}$   | $\bar{t}$ | $\hat{t}$ | $\bar{t}$        | $\hat{t}$ | $\bar{t}$       | $\hat{t}$ |
| courtyard      | 0.27        | 0.02        | 0.85      | 0.75      | 0.34             | 0.03      | 0.01            | 0.01      |
| delivery_area  | 0.15        | 0.04        | 0.37      | 0.24      | 0.01             | 0.00      | 0.09            | 0.00      |
| electro        | 0.21        | 0.03        | 0.30      | 0.10      | 0.01             | 0.01      | 0.01            | 0.01      |
| facade         | 0.25        | 0.00        | 0.43      | 0.18      | 1.01             | 1.01      | 0.01            | 0.00      |
| kicker         | 0.02        | 0.01        | 0.09      | 0.02      | 0.36             | 0.01      | 0.01            | 0.01      |
| meadow         | 0.02        | 0.02        | 0.40      | 0.28      | 0.91             | 1.01      | 0.68            | 0.51      |
| office         | 0.20        | 0.03        | 0.17      | 0.03      | 0.06             | 0.01      | 0.95            | 0.97      |
| pipes          | 0.01        | 0.01        | 0.06      | 0.03      | 0.01             | 0.01      | 0.01            | 0.00      |
| playground     | 0.12        | 0.01        | 0.40      | 0.13      | 1.30             | 0.99      | 0.01            | 0.00      |
| relief         | 0.00        | 0.00        | 0.00      | 0.00      | 0.90             | 0.78      | 0.01            | 0.01      |
| relief_2       | 0.01        | 0.01        | 0.70      | 0.73      | 0.01             | 0.01      | 0.81            | 0.79      |
| terrace        | 0.01        | 0.01        | 0.01      | 0.01      | 0.01             | 0.01      | 0.01            | 0.01      |
| terrains       | 0.01        | 0.01        | 0.02      | 0.01      | 0.00             | 0.00      | 0.42            | 0.05      |
| <b>Average</b> | <b>0.10</b> | <b>0.01</b> | 0.29      | 0.19      | 0.38             | 0.30      | 0.23            | 0.18      |



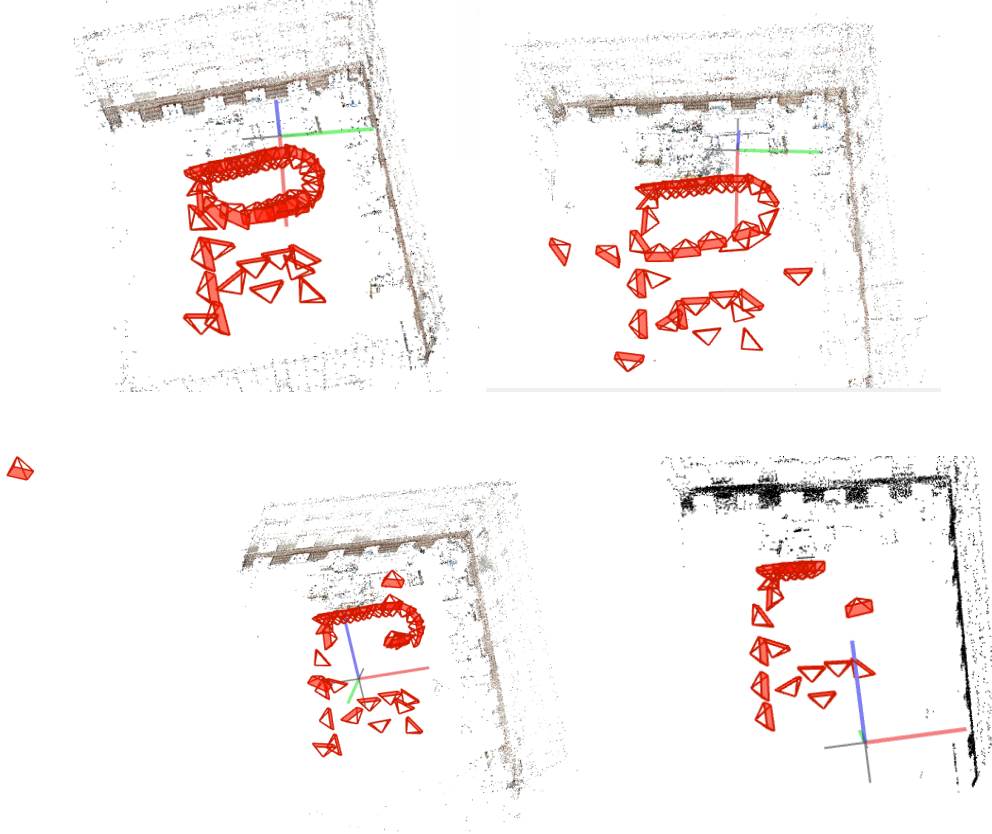

Figure 5: Visualization of camera location estimations and ground truth on the courtyard dataset. Top left: ground truth. Top right: Cycle-Sync. Bottom left: GLOMAP. Bottom right: Theia.

| Dataset        | LUD         |             | BATA        |             | ShapeFit    |             | FusedTA     |             | Cycle-Sync  |             |
|----------------|-------------|-------------|-------------|-------------|-------------|-------------|-------------|-------------|-------------|-------------|
|                | $\bar{t}$   | $\hat{t}$   |
| courtyard      | 0.37        | 0.02        | 0.41        | 0.08        | 0.32        | 0.02        | 0.21        | 0.05        | 0.27        | 0.02        |
| delivery area  | 0.25        | 0.16        | 0.35        | 0.23        | 0.18        | 0.08        | 0.96        | 0.93        | 0.15        | 0.04        |
| electro        | 0.24        | 0.06        | 0.23        | 0.06        | 0.21        | 0.02        | 0.22        | 0.04        | 0.21        | 0.03        |
| facade         | 0.30        | 0.01        | 0.28        | 0.01        | 0.98        | 0.98        | 0.91        | 0.86        | 0.25        | 0.00        |
| kicker         | 0.03        | 0.01        | 0.03        | 0.01        | 0.02        | 0.01        | 0.03        | 0.02        | 0.02        | 0.01        |
| meadow         | 0.06        | 0.02        | 0.11        | 0.05        | 0.08        | 0.02        | 0.08        | 0.02        | 0.02        | 0.02        |
| office         | 0.20        | 0.03        | 0.21        | 0.03        | 0.20        | 0.03        | 0.21        | 0.03        | 0.20        | 0.03        |
| pipes          | 0.01        | 0.01        | 0.02        | 0.01        | 0.01        | 0.01        | 0.01        | 0.01        | 0.01        | 0.01        |
| playground     | 0.16        | 0.03        | 0.15        | 0.04        | 0.08        | 0.01        | 0.17        | 0.08        | 0.12        | 0.01        |
| relief         | 0.00        | 0.00        | 0.03        | 0.01        | 0.00        | 0.00        | 0.00        | 0.00        | 0.00        | 0.00        |
| relief 2       | 0.18        | 0.19        | 0.04        | 0.03        | 0.90        | 0.90        | 0.11        | 0.08        | 0.01        | 0.01        |
| terrace        | 0.01        | 0.01        | 0.01        | 0.01        | 0.01        | 0.01        | 0.01        | 0.01        | 0.01        | 0.01        |
| terrains       | 0.01        | 0.01        | 0.06        | 0.06        | 0.01        | 0.00        | 0.02        | 0.01        | 0.01        | 0.01        |
| <b>Average</b> | <b>0.14</b> | <b>0.04</b> | <b>0.15</b> | <b>0.05</b> | <b>0.23</b> | <b>0.16</b> | <b>0.23</b> | <b>0.16</b> | <b>0.10</b> | <b>0.01</b> |

Table 6: Comparison of mean ( $\bar{t}$ ) and median ( $\hat{t}$ ) translation error for each ETH3D scene for different location estimation algorithms.

## F Runtime

Table 8 compares the runtime of location estimation methods on ETH3D. We observe that STE-based methods are significantly faster than non-STE methods, including LUD+IRLS (the old LUD pipeline). In particular, Cycle-Sync runtime is 48% lower than that of the LUD pipeline. Although Cycle-Sync is slower than common location estimation algorithms such as BATA, ShapeFit, and FusedTA, its

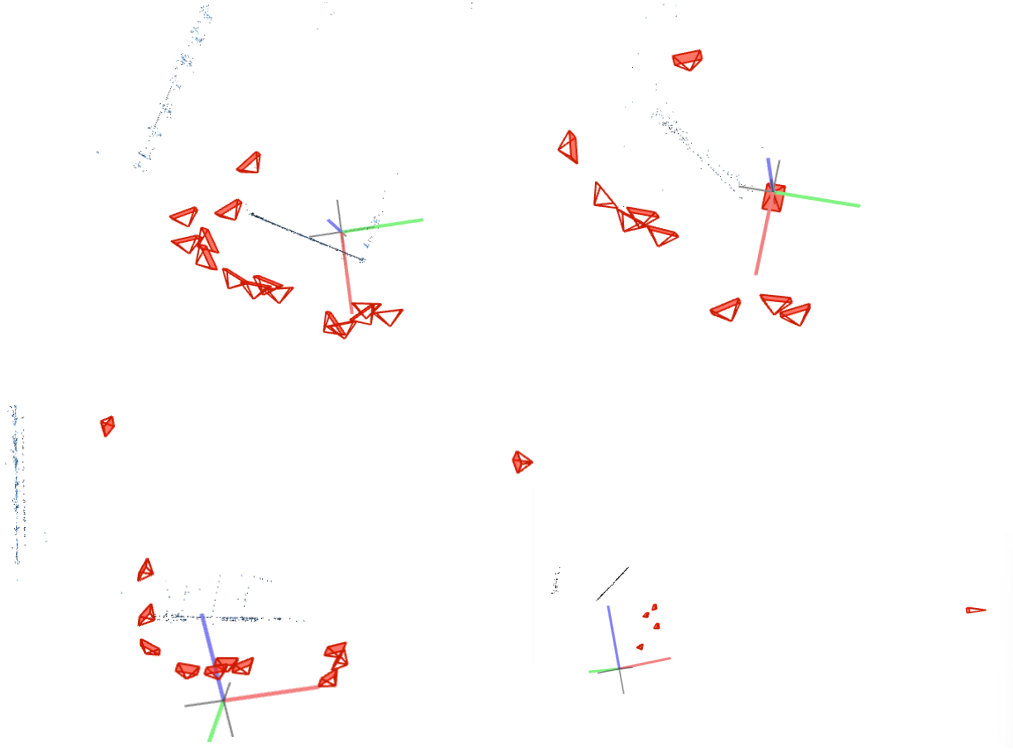

Figure 6: Visualization of camera location estimations and ground truth on the meadow dataset. Top left: ground truth. Top right: Cycle-Sync. Bottom left: GLOMAP. Bottom right: Theia.

| Scene          | LUD+IRLS  |           | LUD+MPLS  |           | LUD+MPLS-cycle |           | Cycle-Sync+MPLS-cycle |           | STE+Cycle-Sync+MPLS-cycle |             |
|----------------|-----------|-----------|-----------|-----------|----------------|-----------|-----------------------|-----------|---------------------------|-------------|
|                | $\bar{t}$ | $\hat{t}$ | $\bar{t}$ | $\hat{t}$ | $\bar{t}$      | $\hat{t}$ | $\bar{t}$             | $\hat{t}$ | $\bar{t}$                 | $\hat{t}$   |
| courtyard      | 0.85      | 0.75      | 0.80      | 0.71      | 0.82           | 0.78      | 0.76                  | 0.39      | 0.27                      | 0.02        |
| delivery area  | 0.37      | 0.24      | 0.36      | 0.23      | 0.37           | 0.28      | 0.16                  | 0.06      | 0.15                      | 0.04        |
| electro        | 0.30      | 0.10      | 0.31      | 0.11      | 0.31           | 0.10      | 0.24                  | 0.04      | 0.21                      | 0.03        |
| facade         | 0.43      | 0.18      | 0.49      | 0.19      | 0.53           | 0.04      | 0.26                  | 0.00      | 0.25                      | 0.00        |
| kicker         | 0.09      | 0.02      | 0.07      | 0.03      | 0.10           | 0.05      | 0.03                  | 0.01      | 0.02                      | 0.01        |
| meadow         | 0.39      | 0.28      | 0.49      | 0.47      | 0.48           | 0.23      | 0.18                  | 0.06      | 0.02                      | 0.02        |
| office         | 0.17      | 0.03      | 0.18      | 0.03      | 0.22           | 0.03      | 0.21                  | 0.03      | 0.20                      | 0.03        |
| pipes          | 0.06      | 0.03      | 0.05      | 0.02      | 0.05           | 0.02      | 0.01                  | 0.01      | 0.01                      | 0.01        |
| playground     | 0.40      | 0.13      | 0.36      | 0.12      | 0.42           | 0.19      | 0.23                  | 0.01      | 0.12                      | 0.01        |
| relief         | 0.00      | 0.00      | 0.00      | 0.00      | 0.00           | 0.00      | 0.00                  | 0.00      | 0.00                      | 0.00        |
| relief 2       | 0.70      | 0.73      | 0.15      | 0.15      | 0.15           | 0.15      | 0.01                  | 0.01      | 0.01                      | 0.01        |
| terrace        | 0.01      | 0.01      | 0.01      | 0.01      | 0.01           | 0.01      | 0.01                  | 0.01      | 0.01                      | 0.01        |
| terrains       | 0.02      | 0.01      | 0.01      | 0.01      | 0.01           | 0.00      | 0.01                  | 0.00      | 0.01                      | 0.01        |
| <b>Average</b> | 0.29      | 0.19      | 0.25      | 0.16      | 0.27           | 0.14      | 0.16                  | 0.05      | <b>0.10</b>               | <b>0.01</b> |

Table 7: Translation errors ( $\bar{t}$  = mean translation error,  $\hat{t}$  = median translation error) across all methods for ablation study.

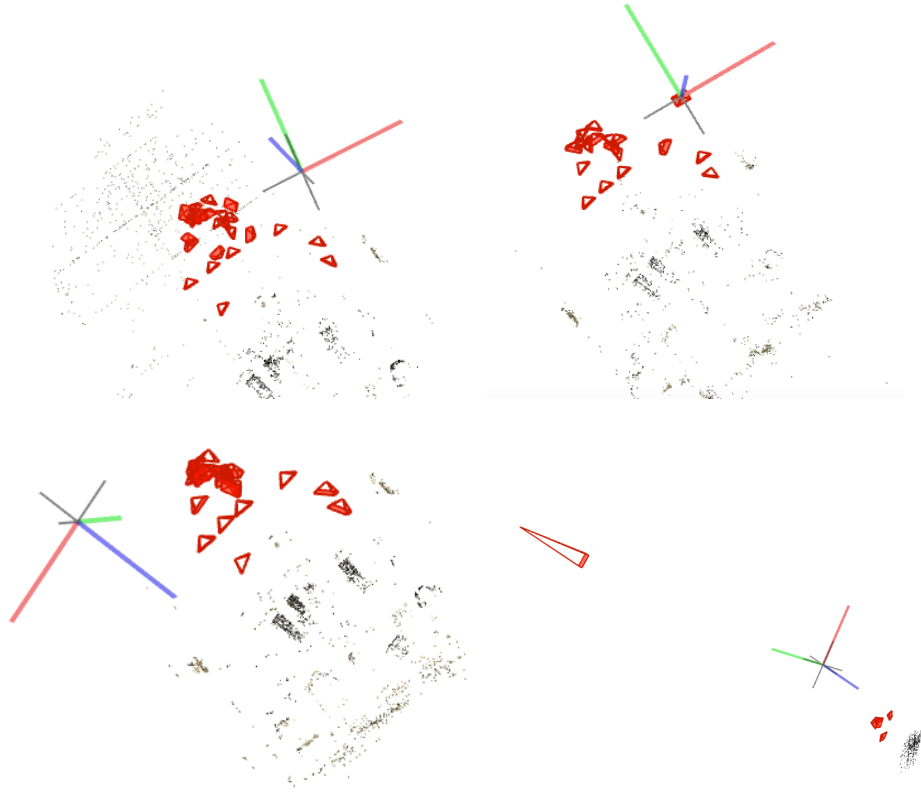

Figure 7: Visualization of camera location estimations and ground truth on the office dataset. Top left: ground truth. Top right: Cycle-Sync. Bottom left: GLOMAP. Bottom right: Theia.

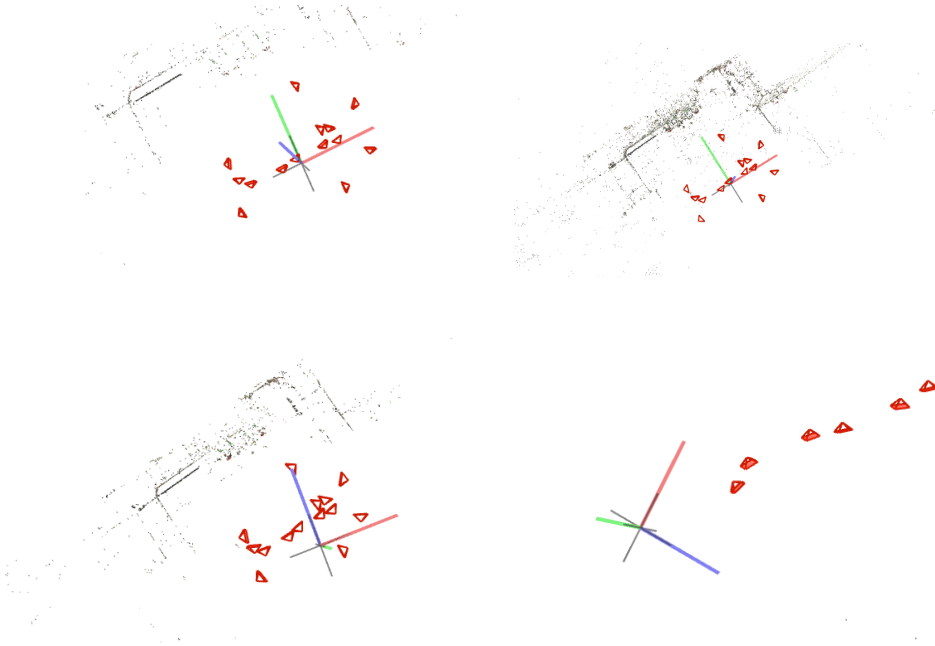

Figure 8: Visualization of camera location estimations and ground truth on the pipes dataset. Top left: ground truth. Top right: Cycle-Sync. Bottom left: GLOMAP. Bottom right: Theia.

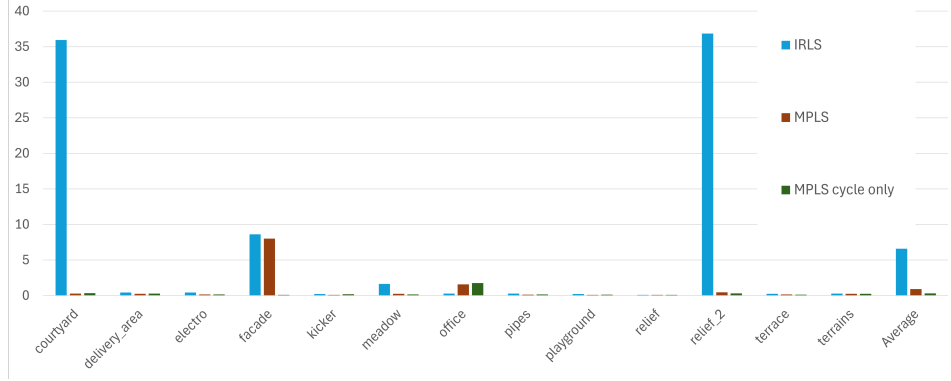

Figure 9: Rotation error (degrees) comparison on ETH3D for different rotation synchronization solvers.

runtime remains within the same order of magnitude, while achieving superior accuracy and stability in camera pose estimation.

| Scene         | LUD+IRLS | LUD+MPLS | STE-based (with MPLS-cycle) |          |              |             |            |
|---------------|----------|----------|-----------------------------|----------|--------------|-------------|------------|
|               |          |          | STE+LUD                     | STE+BATA | STE+ShapeFit | STE+FusedTA | Cycle-Sync |
| courtyard     | 23.60    | 19.38    | 6.10                        | 5.83     | 5.74         | 6.01        | 10.05      |
| delivery area | 16.99    | 15.97    | 4.13                        | 4.06     | 3.95         | 4.16        | 8.38       |
| electro       | 15.58    | 13.92    | 4.21                        | 3.92     | 3.82         | 4.19        | 8.58       |
| facade        | 100.68   | 89.37    | 24.48                       | 23.88    | 24.47        | 24.32       | 30.41      |
| kicker        | 14.31    | 14.30    | 3.94                        | 4.90     | 3.63         | 3.84        | 8.32       |
| meadow        | 0.95     | 0.92     | 0.42                        | 0.40     | 0.41         | 0.58        | 4.63       |
| office        | 1.89     | 1.70     | 0.91                        | 0.86     | 0.87         | 1.02        | 5.16       |
| pipes         | 2.23     | 2.13     | 0.73                        | 0.64     | 0.65         | 0.77        | 4.82       |
| playground    | 10.78    | 9.60     | 2.79                        | 2.62     | 2.57         | 2.84        | 7.34       |
| relief        | 5.49     | 5.09     | 1.48                        | 1.54     | 1.47         | 1.51        | 5.68       |
| relief 2      | 7.93     | 7.90     | 2.33                        | 2.19     | 2.16         | 2.36        | 7.05       |
| terrace       | 8.38     | 8.53     | 1.98                        | 1.99     | 1.89         | 2.01        | 6.47       |
| terrains      | 13.18    | 12.72    | 4.37                        | 3.80     | 3.70         | 3.96        | 8.88       |
| Average       | 17.08    | 15.50    | 4.45                        | 4.36     | <b>4.26</b>  | 4.43        | 8.91       |

Table 8: Runtime comparison (in seconds) of different SfM pipelines on ETH3D.

## G Table and Figures for Rotation Synchronization

In this section we show the tables and figures for rotation errors. Figure 9 demonstrates the rotation errors on ETH3D across different rotation synchronization methods. Table 9 demonstrates the rotation errors on ETH3D across different pipelines.

We observe that MPLS-cycle (used in our Cycle-Sync) greatly improves rotation accuracy over existing pipelines. On average, MPLS-cycle reduces the median rotation error by 62.8% and mean rotation error by 74.1%, compared to the best existing pipeline GLOMAP. Also, our proposed MPLS-cycle reduces the mean rotation error of MPLS by 56.6% and median rotation error by 64.8%. It is worth noting that Cycle-Sync outperforms GLOMAP and Theia even without bundle adjustment. This demonstrates that even without bundle adjustment, our approach outperforms baselines that rely on it.

## H Additional Experiment for IMC-PT

In this section we compare the camera location estimation results for different location estimation algorithms on IMC-PT. This dataset consists of 9 city-scale image sets, as well as ground truth camera poses estimated by aligning COLMAP SfM model with a LiDAR scan. We generate image matches using LoFTR [29], a deep learning feature matching method instead of SIFT. We use LoFTR since

Table 9: Comparison of rotation error (degrees) on ETH3D for different pipelines. Here  $\bar{R}$ ,  $\hat{R}$  means the mean rotation error and the median rotation error measured in degrees ( $0^\circ$ - $180^\circ$ ) respectively. BA refers to bundle adjustment.

| Scene          | Cycle-Sync  |             | LUD       |           | GLOMAP (with BA) |           | Theia (with BA) |           |
|----------------|-------------|-------------|-----------|-----------|------------------|-----------|-----------------|-----------|
|                | $\bar{R}$   | $\hat{R}$   | $\bar{R}$ | $\hat{R}$ | $\bar{R}$        | $\hat{R}$ | $\bar{R}$       | $\hat{R}$ |
| courtyard      | 0.78        | 0.36        | 43.85     | 35.93     | 3.50             | 1.61      | 0.14            | 0.10      |
| delivery_area  | 0.76        | 0.28        | 0.78      | 0.43      | 0.09             | 0.07      | 0.41            | 0.21      |
| electro        | 1.11        | 0.18        | 1.28      | 0.45      | 0.11             | 0.11      | 0.07            | 0.06      |
| facade         | 0.18        | 0.11        | 18.10     | 8.64      | 0.78             | 0.35      | 0.09            | 0.09      |
| kicker         | 0.44        | 0.21        | 0.25      | 0.22      | 0.47             | 0.22      | 0.11            | 0.09      |
| meadow         | 0.29        | 0.18        | 2.94      | 1.64      | 21.13            | 6.05      | 3.14            | 3.37      |
| office         | 3.39        | 1.69        | 8.98      | 0.29      | 0.69             | 0.34      | 7.23            | 6.34      |
| pipes          | 0.17        | 0.18        | 0.34      | 0.28      | 0.12             | 0.13      | 0.08            | 0.09      |
| playground     | 0.17        | 0.14        | 0.34      | 0.22      | 0.67             | 0.23      | 0.07            | 0.09      |
| relief         | 0.11        | 0.11        | 0.11      | 0.12      | 3.18             | 1.68      | 0.14            | 0.15      |
| relief_2       | 0.29        | 0.31        | 41.78     | 36.84     | 0.10             | 0.10      | 36.85           | 34.23     |
| terrace        | 0.15        | 0.13        | 0.27      | 0.27      | 0.12             | 0.12      | 0.15            | 0.13      |
| terrains       | 0.22        | 0.25        | 0.27      | 0.29      | 0.19             | 0.21      | 3.54            | 1.78      |
| <b>Average</b> | <b>0.62</b> | <b>0.32</b> | 9.18      | 6.59      | 2.40             | 0.86      | 4.00            | 3.59      |

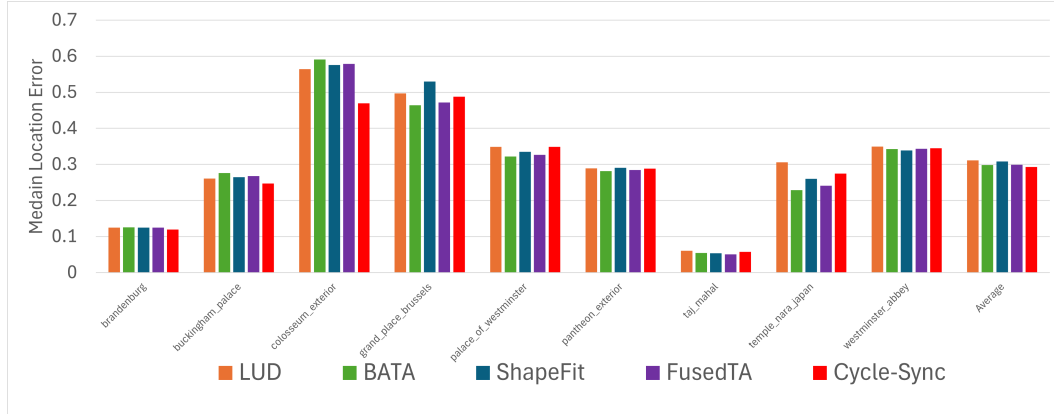

Figure 10: Median translation error for each IMC-PT scene and their average. The last column denotes the average median error across all datasets.

it is proved to be effective on popular homography estimation, relative pose estimation and visual localization benchmarks. Table 10 and Figure 10 demonstrate the location error of different location estimation algorithms, where rotation synchronization method is MPLS-cycle and all methods use STE.

We observe that Cycle-Sync achieves the smallest mean and median location error averaging on all datasets. For 3 out of 9 datasets, Cycle-Sync achieves both the smallest mean and median error. For other datasets, Cycle-Sync achieves no significantly larger mean and median error. The largest difference from Cycle-Sync to the best method in mean and median location error is 0.05, which is small compared to the average scale of location. The improvement of Cycle-Sync is smaller than that in ETH3D. We believe the reason is that LoFTR is not a good feature for this dataset, since it tends to overfit repetitive structures such as windows and facades. To sum up, while the gains over baselines are smaller than on ETH3D, Cycle-Sync still achieves the best mean and median across most scenes.

Table 10: Translation Errors ( $\bar{t}$  and  $\hat{t}$ ) for IMC-PT.

| Scene          | LUD       |           | BATA      |           | ShapeFit  |           | FusedTA   |           | Cycle-Sync  |             |
|----------------|-----------|-----------|-----------|-----------|-----------|-----------|-----------|-----------|-------------|-------------|
|                | $\bar{t}$ | $\hat{t}$ | $\bar{t}$ | $\hat{t}$ | $\bar{t}$ | $\hat{t}$ | $\bar{t}$ | $\hat{t}$ | $\bar{t}$   | $\hat{t}$   |
| brandenburg    |           |           |           |           |           |           |           |           |             |             |
| gate           | 0.24      | 0.13      | 0.25      | 0.13      | 0.24      | 0.12      | 0.24      | 0.12      | 0.24        | 0.12        |
| buckingham     |           |           |           |           |           |           |           |           |             |             |
| palace         | 0.36      | 0.26      | 0.37      | 0.28      | 0.38      | 0.26      | 0.37      | 0.27      | 0.35        | 0.25        |
| colosseum      |           |           |           |           |           |           |           |           |             |             |
| exterior       | 0.75      | 0.56      | 0.90      | 0.59      | 0.67      | 0.58      | 0.92      | 0.58      | 0.56        | 0.47        |
| grand place    |           |           |           |           |           |           |           |           |             |             |
| brussels       | 0.55      | 0.50      | 0.54      | 0.46      | 0.60      | 0.53      | 0.54      | 0.47      | 0.54        | 0.49        |
| palace of      |           |           |           |           |           |           |           |           |             |             |
| westminster    | 0.43      | 0.35      | 0.40      | 0.32      | 0.44      | 0.33      | 0.41      | 0.33      | 0.44        | 0.35        |
| pantheon       |           |           |           |           |           |           |           |           |             |             |
| exterior       | 0.44      | 0.29      | 0.44      | 0.28      | 0.44      | 0.29      | 0.44      | 0.28      | 0.44        | 0.29        |
| taj            |           |           |           |           |           |           |           |           |             |             |
| mahal          | 0.12      | 0.06      | 0.12      | 0.05      | 0.12      | 0.05      | 0.12      | 0.05      | 0.12        | 0.06        |
| temple nara    |           |           |           |           |           |           |           |           |             |             |
| japan          | 0.48      | 0.31      | 0.43      | 0.23      | 0.45      | 0.26      | 0.43      | 0.24      | 0.46        | 0.27        |
| westminster    |           |           |           |           |           |           |           |           |             |             |
| abbey          | 0.87      | 0.35      | 0.84      | 0.34      | 0.83      | 0.34      | 0.84      | 0.34      | 0.89        | 0.35        |
| <b>Average</b> | 0.47      | 0.31      | 0.48      | 0.30      | 0.46      | 0.31      | 0.48      | 0.30      | <b>0.45</b> | <b>0.29</b> |

## I Additional Supplementary Tables for ETH3D

### I.1 Sensitivity to Initialization

In tables [12](#) and [11](#) we report the mean and median location error on ETH3D data (averaged over different scenes) after several iterations for T-AAB and trivial initialization schemes. While the T-AAB initialization accelerates convergence by providing better starting weights, it does not significantly influence the final accuracy. Even trivial initialization using uniform weights performs similarly after sufficient iterations. Therefore, our method is robust even to trivial initialization, let alone variations in the T-AAB parameter.

| Iteration | Mean Error | Median Error |
|-----------|------------|--------------|
| 5         | 0.110      | 0.020        |
| 10        | 0.100      | 0.017        |
| 15        | 0.099      | 0.016        |
| 20        | 0.099      | 0.016        |

Table 11: Performance with trivial (uniform) initialization.

| Iteration | Mean Error | Median Error |
|-----------|------------|--------------|
| 5         | 0.102      | 0.018        |
| 10        | 0.099      | 0.016        |
| 15        | 0.099      | 0.015        |
| 20        | 0.099      | 0.014        |

Table 12: Performance with T-AAB initialization.

### I.2 Replacing LUD with BATA in Our Pipeline

In table [13](#) we show results of replacing LUD with BATA within our reweighting framework. Indeed, integrating LUD under Cycle-Sync’s reweighting leads to better performance compared to integrating BATA. This is likely due to the stronger constraint of LUD for preventing collapsed trivial solution (the constraint is enforced on every edge). Moreover, our Welsh-type objective function already accounts

for large variations in distances, making angle-based methods such as BATA less advantageous in this case.

| Method    | Mean Error | Median Error |
|-----------|------------|--------------|
| Ours-LUD  | 0.099      | 0.014        |
| Ours-BATA | 0.202      | 0.079        |

Table 13: Comparison between LUD and BATA integration under the Cycle-Sync framework on ETH3D data.

### I.3 Annealing Schedule $\lambda_t$

In tables 14 and 15 we include synthetic experiments for different annealing schedules  $\lambda_t$  in settings with both additive noise and high corruption. Table 14 uses uniform corruption with  $q = 0.7$  and higher noise level  $\sigma = 0.2$ .

| $\lambda_t$ | $\frac{t}{10+t}$ (ours) | 0    | $\frac{10}{10+t}$ | 1    | $\frac{t}{t+5}$ |
|-------------|-------------------------|------|-------------------|------|-----------------|
| median err  | 0.24                    | 0.36 | 0.27              | 0.37 | 0.29            |

Table 14: Uniform corruption  $q = 0.7$ , noise level  $\sigma = 0.2$ .

Table 15 the adversarial corruption with  $q = 0.45$  (close to the theoretical limit  $q = 0.5$ ) and higher noise level  $\sigma = 0.2$ .

| $\lambda_t$ | $\frac{t}{10+t}$ (ours) | 0    | $\frac{10}{10+t}$ | 1    | $\frac{t}{t+5}$ |
|-------------|-------------------------|------|-------------------|------|-----------------|
| median err  | 0.17                    | 0.32 | 0.18              | 0.20 | 0.17            |

Table 15: Adversarial corruption  $q = 0.45$ , noise level  $\sigma = 0.2$ .

We observe that our choice of  $\lambda_t$  has the lowest median error for both settings. Therefore, our proposed schedule strikes a good balance between residual-driven updates early on and cycle-consistency emphasis later. This schedule has consistently outperformed alternatives, particularly in settings with both additive noise and high corruption.

We remark that using only the residual for reweighting (i.e., setting  $\lambda_t = 0$ , which corresponds to IRLS) often leads to significantly higher errors compared to cycle-based reweighting methods. The underlying issue is that, in noisy settings, some bad edges may coincidentally exhibit low residuals. When this occurs, the aggressive reweighting imposed by the Welsch objective can assign them disproportionately large weights, thereby amplifying their adverse impact. In contrast, our cycle-based reweighting effectively overcomes this limitation: it is extremely unlikely for a bad edge to exhibit a low average cycle inconsistency, unless all cycles it participates in are consistent—an event that is highly improbable for corrupted measurements. Overall, we find that our annealing strategy consistently achieves the best performance across most scenarios.

We also observe this trend in the context of rotation synchronization. Figure G illustrates that emphasizing cycle-consistency can significantly reduce orientation error. However, for rotation there is no need for annealing as it does not rely on distance estimation.

## J Additional Experiment on 1DSfM Datasets

We report the mean and median location errors for 1DSfM dataset (averaged over different scenes), with all methods consistently preprocessed using STE and MPLS-cycle in table 16. Note that the ground truth camera poses in 1DSfM are generated by Bundler, which is considered outdated compared to modern tools like COLMAP (and even COLMAP may lack the accuracy of laser scans). We remark that this could be less reliable when benchmarking high-precision location solvers.

| <b>Method</b> | <b>Mean Error</b> | <b>Median Error</b> |
|---------------|-------------------|---------------------|
| Ours          | 0.292             | 0.115               |
| LUD           | 0.314             | 0.132               |
| BATA          | 0.362             | 0.130               |
| ShapeFit      | 0.670             | 0.410               |
| FusedTA       | 0.330             | 0.130               |

Table 16: Performance comparison on the 1DSfM (photo tourism) datasets, averaged over multiple scenes. All methods are processed with STE and MPLS-cycle.



## NeurIPS Paper Checklist

### 1. Claims

Question: Do the main claims made in the abstract and introduction accurately reflect the paper's contributions and scope?

Answer: [\[Yes\]](#)

Justification: The abstract and introduction clearly state the main contributions, including a new robust location solver, theoretical guarantees, and a bundle-adjustment-free SfM pipeline. These are supported in Sections 1–2 and validated in experiments (Sections 3–4).

Guidelines:

- The answer NA means that the abstract and introduction do not include the claims made in the paper.
- The abstract and/or introduction should clearly state the claims made, including the contributions made in the paper and important assumptions and limitations. A No or NA answer to this question will not be perceived well by the reviewers.
- The claims made should match theoretical and experimental results, and reflect how much the results can be expected to generalize to other settings.
- It is fine to include aspirational goals as motivation as long as it is clear that these goals are not attained by the paper.

### 2. Limitations

Question: Does the paper discuss the limitations of the work performed by the authors?

Answer: [\[Yes\]](#)

Justification: Section 5 discusses limitations, such as the lack of convergence guarantees for the full nonconvex optimization, dependence on well-shaped cycles, and the need for adaptive hyperparameters.

Guidelines:

- The answer NA means that the paper has no limitation while the answer No means that the paper has limitations, but those are not discussed in the paper.
- The authors are encouraged to create a separate "Limitations" section in their paper.
- The paper should point out any strong assumptions and how robust the results are to violations of these assumptions (e.g., independence assumptions, noiseless settings, model well-specification, asymptotic approximations only holding locally). The authors should reflect on how these assumptions might be violated in practice and what the implications would be.
- The authors should reflect on the scope of the claims made, e.g., if the approach was only tested on a few datasets or with a few runs. In general, empirical results often depend on implicit assumptions, which should be articulated.
- The authors should reflect on the factors that influence the performance of the approach. For example, a facial recognition algorithm may perform poorly when image resolution is low or images are taken in low lighting. Or a speech-to-text system might not be used reliably to provide closed captions for online lectures because it fails to handle technical jargon.
- The authors should discuss the computational efficiency of the proposed algorithms and how they scale with dataset size.
- If applicable, the authors should discuss possible limitations of their approach to address problems of privacy and fairness.
- While the authors might fear that complete honesty about limitations might be used by reviewers as grounds for rejection, a worse outcome might be that reviewers discover limitations that aren't acknowledged in the paper. The authors should use their best judgment and recognize that individual actions in favor of transparency play an important role in developing norms that preserve the integrity of the community. Reviewers will be specifically instructed to not penalize honesty concerning limitations.

### 3. Theory assumptions and proofs

Question: For each theoretical result, does the paper provide the full set of assumptions and a complete (and correct) proof?

Answer: [Yes]

Justification: The paper states all assumptions clearly (Section 2.3) and provides a full theorem with conditions and proof outline. Detailed proofs are deferred to the supplement, as referenced in the main text.

Guidelines:

- The answer NA means that the paper does not include theoretical results.
- All the theorems, formulas, and proofs in the paper should be numbered and cross-referenced.
- All assumptions should be clearly stated or referenced in the statement of any theorems.
- The proofs can either appear in the main paper or the supplemental material, but if they appear in the supplemental material, the authors are encouraged to provide a short proof sketch to provide intuition.
- Inversely, any informal proof provided in the core of the paper should be complemented by formal proofs provided in appendix or supplemental material.
- Theorems and Lemmas that the proof relies upon should be properly referenced.

#### 4. Experimental result reproducibility

Question: Does the paper fully disclose all the information needed to reproduce the main experimental results of the paper to the extent that it affects the main claims and/or conclusions of the paper (regardless of whether the code and data are provided or not)?

Answer: [Yes]

Justification: The paper specifies all dataset sources, model setups, and alignment procedures in Sections 3 and 4. Synthetic data generation and evaluation metrics are also precisely described.

Guidelines:

- The answer NA means that the paper does not include experiments.
- If the paper includes experiments, a No answer to this question will not be perceived well by the reviewers: Making the paper reproducible is important, regardless of whether the code and data are provided or not.
- If the contribution is a dataset and/or model, the authors should describe the steps taken to make their results reproducible or verifiable.
- Depending on the contribution, reproducibility can be accomplished in various ways. For example, if the contribution is a novel architecture, describing the architecture fully might suffice, or if the contribution is a specific model and empirical evaluation, it may be necessary to either make it possible for others to replicate the model with the same dataset, or provide access to the model. In general, releasing code and data is often one good way to accomplish this, but reproducibility can also be provided via detailed instructions for how to replicate the results, access to a hosted model (e.g., in the case of a large language model), releasing of a model checkpoint, or other means that are appropriate to the research performed.
- While NeurIPS does not require releasing code, the conference does require all submissions to provide some reasonable avenue for reproducibility, which may depend on the nature of the contribution. For example
  - (a) If the contribution is primarily a new algorithm, the paper should make it clear how to reproduce that algorithm.
  - (b) If the contribution is primarily a new model architecture, the paper should describe the architecture clearly and fully.
  - (c) If the contribution is a new model (e.g., a large language model), then there should either be a way to access this model for reproducing the results or a way to reproduce the model (e.g., with an open-source dataset or instructions for how to construct the dataset).

- (d) We recognize that reproducibility may be tricky in some cases, in which case authors are welcome to describe the particular way they provide for reproducibility. In the case of closed-source models, it may be that access to the model is limited in some way (e.g., to registered users), but it should be possible for other researchers to have some path to reproducing or verifying the results.

## 5. Open access to data and code

Question: Does the paper provide open access to the data and code, with sufficient instructions to faithfully reproduce the main experimental results, as described in supplemental material?

Answer: [No]

Justification: Code and data are not released yet but will be made publicly available upon publication. This is noted in the supplementary material.

Guidelines:

- The answer NA means that paper does not include experiments requiring code.
- Please see the NeurIPS code and data submission guidelines (<https://nips.cc/public/guides/CodeSubmissionPolicy>) for more details.
- While we encourage the release of code and data, we understand that this might not be possible, so “No” is an acceptable answer. Papers cannot be rejected simply for not including code, unless this is central to the contribution (e.g., for a new open-source benchmark).
- The instructions should contain the exact command and environment needed to run to reproduce the results. See the NeurIPS code and data submission guidelines (<https://nips.cc/public/guides/CodeSubmissionPolicy>) for more details.
- The authors should provide instructions on data access and preparation, including how to access the raw data, preprocessed data, intermediate data, and generated data, etc.
- The authors should provide scripts to reproduce all experimental results for the new proposed method and baselines. If only a subset of experiments are reproducible, they should state which ones are omitted from the script and why.
- At submission time, to preserve anonymity, the authors should release anonymized versions (if applicable).
- Providing as much information as possible in supplemental material (appended to the paper) is recommended, but including URLs to data and code is permitted.

## 6. Experimental setting/details

Question: Does the paper specify all the training and test details (e.g., data splits, hyper-parameters, how they were chosen, type of optimizer, etc.) necessary to understand the results?

Answer: [Yes]

Justification: Section 3 and 4 detail the experimental setups, including data generation, corruption models, parameter choices, and evaluation metrics.

Guidelines:

- The answer NA means that the paper does not include experiments.
- The experimental setting should be presented in the core of the paper to a level of detail that is necessary to appreciate the results and make sense of them.
- The full details can be provided either with the code, in appendix, or as supplemental material.

## 7. Experiment statistical significance

Question: Does the paper report error bars suitably and correctly defined or other appropriate information about the statistical significance of the experiments?

Answer: [Yes]

Justification: Median errors are reported with standard deviations over 10 independent trials. This is stated in Section 3 and shown in Figures 3 and 4.

Guidelines:

- The answer NA means that the paper does not include experiments.
- The authors should answer "Yes" if the results are accompanied by error bars, confidence intervals, or statistical significance tests, at least for the experiments that support the main claims of the paper.
- The factors of variability that the error bars are capturing should be clearly stated (for example, train/test split, initialization, random drawing of some parameter, or overall run with given experimental conditions).
- The method for calculating the error bars should be explained (closed form formula, call to a library function, bootstrap, etc.)
- The assumptions made should be given (e.g., Normally distributed errors).
- It should be clear whether the error bar is the standard deviation or the standard error of the mean.
- It is OK to report 1-sigma error bars, but one should state it. The authors should preferably report a 2-sigma error bar than state that they have a 96% CI, if the hypothesis of Normality of errors is not verified.
- For asymmetric distributions, the authors should be careful not to show in tables or figures symmetric error bars that would yield results that are out of range (e.g. negative error rates).
- If error bars are reported in tables or figures, The authors should explain in the text how they were calculated and reference the corresponding figures or tables in the text.

#### 8. Experiments compute resources

Question: For each experiment, does the paper provide sufficient information on the computer resources (type of compute workers, memory, time of execution) needed to reproduce the experiments?

Answer: [Yes]

Justification: Section 4 reports that real-data experiments were conducted on a laptop with Intel i9 CPU (2.50 GHz, 8 cores, 16 threads) and 16 GB RAM.

Guidelines:

- The answer NA means that the paper does not include experiments.
- The paper should indicate the type of compute workers CPU or GPU, internal cluster, or cloud provider, including relevant memory and storage.
- The paper should provide the amount of compute required for each of the individual experimental runs as well as estimate the total compute.
- The paper should disclose whether the full research project required more compute than the experiments reported in the paper (e.g., preliminary or failed experiments that didn't make it into the paper).

#### 9. Code of ethics

Question: Does the research conducted in the paper conform, in every respect, with the NeurIPS Code of Ethics <https://neurips.cc/public/EthicsGuidelines?>

Answer: [Yes]

Justification: The work uses only public, anonymized datasets and conforms to the NeurIPS Code of Ethics. There are no violations of ethical standards.

Guidelines:

- The answer NA means that the authors have not reviewed the NeurIPS Code of Ethics.
- If the authors answer No, they should explain the special circumstances that require a deviation from the Code of Ethics.
- The authors should make sure to preserve anonymity (e.g., if there is a special consideration due to laws or regulations in their jurisdiction).

#### 10. Broader impacts

Question: Does the paper discuss both potential positive societal impacts and negative societal impacts of the work performed?

Answer: [Yes]

Justification: Section “Broader Impact” only discusses positive applications (e.g., AR/VR, robotics). The authors are not aware of any direct negative society impact.

Guidelines:

- The answer NA means that there is no societal impact of the work performed.
- If the authors answer NA or No, they should explain why their work has no societal impact or why the paper does not address societal impact.
- Examples of negative societal impacts include potential malicious or unintended uses (e.g., disinformation, generating fake profiles, surveillance), fairness considerations (e.g., deployment of technologies that could make decisions that unfairly impact specific groups), privacy considerations, and security considerations.
- The conference expects that many papers will be foundational research and not tied to particular applications, let alone deployments. However, if there is a direct path to any negative applications, the authors should point it out. For example, it is legitimate to point out that an improvement in the quality of generative models could be used to generate deepfakes for disinformation. On the other hand, it is not needed to point out that a generic algorithm for optimizing neural networks could enable people to train models that generate Deepfakes faster.
- The authors should consider possible harms that could arise when the technology is being used as intended and functioning correctly, harms that could arise when the technology is being used as intended but gives incorrect results, and harms following from (intentional or unintentional) misuse of the technology.
- If there are negative societal impacts, the authors could also discuss possible mitigation strategies (e.g., gated release of models, providing defenses in addition to attacks, mechanisms for monitoring misuse, mechanisms to monitor how a system learns from feedback over time, improving the efficiency and accessibility of ML).

#### 11. Safeguards

Question: Does the paper describe safeguards that have been put in place for responsible release of data or models that have a high risk for misuse (e.g., pretrained language models, image generators, or scraped datasets)?

Answer: [NA]

Justification: The method does not involve high-risk models (e.g., generative models or scraped datasets) that would require safeguards.

Guidelines:

- The answer NA means that the paper poses no such risks.
- Released models that have a high risk for misuse or dual-use should be released with necessary safeguards to allow for controlled use of the model, for example by requiring that users adhere to usage guidelines or restrictions to access the model or implementing safety filters.
- Datasets that have been scraped from the Internet could pose safety risks. The authors should describe how they avoided releasing unsafe images.
- We recognize that providing effective safeguards is challenging, and many papers do not require this, but we encourage authors to take this into account and make a best faith effort.

#### 12. Licenses for existing assets

Question: Are the creators or original owners of assets (e.g., code, data, models), used in the paper, properly credited and are the license and terms of use explicitly mentioned and properly respected?

Answer: [Yes]

Justification: All external datasets and methods used (e.g., ETH3D, SIFT, RANSAC) are properly cited and covered under academic/research licenses.

Guidelines:

- The answer NA means that the paper does not use existing assets.
- The authors should cite the original paper that produced the code package or dataset.

- The authors should state which version of the asset is used and, if possible, include a URL.
- The name of the license (e.g., CC-BY 4.0) should be included for each asset.
- For scraped data from a particular source (e.g., website), the copyright and terms of service of that source should be provided.
- If assets are released, the license, copyright information, and terms of use in the package should be provided. For popular datasets, [paperswithcode.com/datasets](https://paperswithcode.com/datasets) has curated licenses for some datasets. Their licensing guide can help determine the license of a dataset.
- For existing datasets that are re-packaged, both the original license and the license of the derived asset (if it has changed) should be provided.
- If this information is not available online, the authors are encouraged to reach out to the asset's creators.

### 13. New assets

Question: Are new assets introduced in the paper well documented and is the documentation provided alongside the assets?

Answer: [NA]

Justification: The paper does not introduce new datasets or pre-trained models that require documentation or licensing.

Guidelines:

- The answer NA means that the paper does not release new assets.
- Researchers should communicate the details of the dataset/code/model as part of their submissions via structured templates. This includes details about training, license, limitations, etc.
- The paper should discuss whether and how consent was obtained from people whose asset is used.
- At submission time, remember to anonymize your assets (if applicable). You can either create an anonymized URL or include an anonymized zip file.

### 14. Crowdsourcing and research with human subjects

Question: For crowdsourcing experiments and research with human subjects, does the paper include the full text of instructions given to participants and screenshots, if applicable, as well as details about compensation (if any)?

Answer: [NA]

Justification: No human subjects or crowdsourcing were involved.

Guidelines:

- The answer NA means that the paper does not involve crowdsourcing nor research with human subjects.
- Including this information in the supplemental material is fine, but if the main contribution of the paper involves human subjects, then as much detail as possible should be included in the main paper.
- According to the NeurIPS Code of Ethics, workers involved in data collection, curation, or other labor should be paid at least the minimum wage in the country of the data collector.

### 15. Institutional review board (IRB) approvals or equivalent for research with human subjects

Question: Does the paper describe potential risks incurred by study participants, whether such risks were disclosed to the subjects, and whether Institutional Review Board (IRB) approvals (or an equivalent approval/review based on the requirements of your country or institution) were obtained?

Answer: [NA]

Justification: The paper does not involve human participants, so IRB approval is not applicable.

Guidelines:

- The answer NA means that the paper does not involve crowdsourcing nor research with human subjects.
- Depending on the country in which research is conducted, IRB approval (or equivalent) may be required for any human subjects research. If you obtained IRB approval, you should clearly state this in the paper.
- We recognize that the procedures for this may vary significantly between institutions and locations, and we expect authors to adhere to the NeurIPS Code of Ethics and the guidelines for their institution.
- For initial submissions, do not include any information that would break anonymity (if applicable), such as the institution conducting the review.

**16. Declaration of LLM usage**

Question: Does the paper describe the usage of LLMs if it is an important, original, or non-standard component of the core methods in this research? Note that if the LLM is used only for writing, editing, or formatting purposes and does not impact the core methodology, scientific rigorousness, or originality of the research, declaration is not required.

Answer: [NA]

Justification: LLMs were not used in the methodology, experimentation, or theoretical analysis.

Guidelines:

- The answer NA means that the core method development in this research does not involve LLMs as any important, original, or non-standard components.
- Please refer to our LLM policy (<https://neurips.cc/Conferences/2025/LLM>) for what should or should not be described.
